# Supplementary material for: Mitochondria and aging in older individuals: an analysis of DNA methylation age metrics, leukocyte telomere length, and mitochondrial DNA copy number in the VA normative aging study
Source: Aging (Albany NY). 2020 Feb 2;12(3):2070–83. doi: 10.18632/aging.102722 (PMC7041780; doi:10.18632/aging.102722)
Supplement: Supplementary Figure 1 [file aging-12-102722-s001..pdf]

SUPPLEMENTARY FIGURE

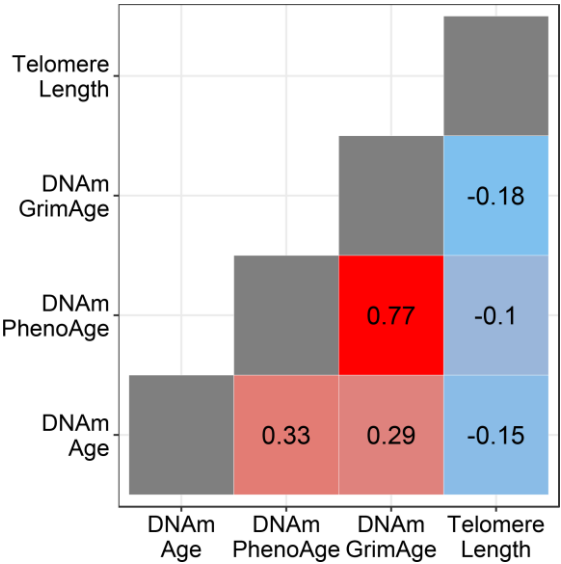

**Supplementary Figure 1. Correlation matrix between the four aging biomarkers.** The values in the figure show the coefficient estimates ( $\rho$ ) from Spearman correlation analyses for each estimate, also indicated by color. The p-values for all pairwise comparisons were  $<0.02$ .
