# Supplementary material for: Mitochondria and aging in older individuals: an analysis of DNA methylation age metrics, leukocyte telomere length, and mitochondrial DNA copy number in the VA normative aging study
Source: publisher site journal article supplement (doi:10.18632/aging.102722), 2020-02-02
Supplement: Supplementary file [file aging-v12i3-102722-supplementary-material-SD2.pdf]

## SUPPLEMENTARY TABLES

**Supplementary Table 1. PCR primers.**

| Assay           | Component                                | Sequence                                                                |
|-----------------|------------------------------------------|-------------------------------------------------------------------------|
| mtDNA           | mtDNA Forward Primer (mtF805)            | 5' CCACGGGAAACAGCAGTGATT 3'                                             |
| mtDNA           | mtDNA Reverse Primer (mtR927)            | 5' CTATTGACTTGGGTAAATCGTGTGA 3'                                         |
| mtDNA           | mtDNA TaqMan Probe<br>(LifeTechnologies) | 6FAM- 5' TGCCAGCCACCGCG 3'-MGB                                          |
| Telomere Length | Telc                                     | 5'-TGT TAG GTA TCC CTA TCC CTA TCC CTA TCC<br>CTA TCC CTA ACA-3'        |
| Telomere Length | Telg                                     | 5'-ACA CTA AGG TTT GGG TTT GGG TTT GGG<br>TTT GGG TTA GTG T-3'          |
| Telomere Length | Albd                                     | 5'-GCC CGG CCC GCC GCG CCC GTC CCG CCG<br>GAA AAG CAT GGT CGC CTG TT-3' |
| Telomere Length | Albu                                     | 5'-CGG CGG CGG GCG GCG GCT GGG CGG<br>AAA TGC TGC ACA GAA TCC TTG-3'    |

**Supplementary Table 2. Cross-sectional analysis of mitochondrial DNA copy number (mtDNACn) and aging biomarkers.**

| mtDNACn<br>* | DNAm-Age                |         | DNAm-PhenoAge           |         | DNAm-GrimAge           |         | Telomere Length        |         |
|--------------|-------------------------|---------|-------------------------|---------|------------------------|---------|------------------------|---------|
|              | $\beta$ (95% CI)        | P-value | $\beta$ (95% CI)        | P-value | $\beta$ (95% CI)       | P-value | $\beta$ (95% CI)       | P-value |
| Q1           | Reference               |         | Reference               |         | Reference              |         | Reference              |         |
| Q2           | -0.21<br>(-0.85, 0.43)  | 0.52    | -0.80<br>(-1.49, -0.12) | 0.02    | -0.02<br>(-0.31, 0.28) | 0.91    | 0.06<br>(-0.02, 0.13)  | 0.13    |
| Q3           | -0.59<br>(-1.29, 0.12)  | 0.10    | -1.01<br>(-1.75, -0.26) | 0.01    | -0.02<br>(-0.35, 0.3)  | 0.90    | 0.03<br>(-0.05, 0.1)   | 0.49    |
| Q4           | -1.11<br>(-1.88, -0.35) | 0.00    | -0.83<br>(-1.65, -0.02) | 0.04    | 0<br>(-0.36, 0.36)     | 1.00    | -0.01<br>(-0.08, 0.06) | 0.80    |
| p-trend**    | -1.47<br>(-2.79, -0.16) | 0.03    | -0.16<br>(-1.48, 1.16)  | 0.82    | 0.12<br>(-0.47, 0.7)   | 0.70    | -0.01<br>(-0.11, 0.1)  | 0.88    |

\*Models adjusted for chronological age, smoking, alcohol use, BMI, cell composition, follow up time, hypertension status, CHD status, and diabetes status.

**Supplementary Table 3. Propsective analyses of baseline mitochondrial copy number (mtDNACn) with aging biomarkers during follow up.**

| mtDNACn   | DNAm-Age              |         | DNAm-PhenoAge         |         | DNAm-GrimAge           |         | Telomere Length         |         |
|-----------|-----------------------|---------|-----------------------|---------|------------------------|---------|-------------------------|---------|
|           | $\beta$ (95% CI)      | P-value | $\beta$ (95% CI)      | P-value | $\beta$ (95% CI)       | P-value | $\beta$ (95% CI)        | P-value |
| Q1        | Reference             |         | Reference             |         | Reference              |         | Reference               |         |
| Q2        | -0.38<br>(-1.35, 0.6) | 0.45    | 1.05<br>(0.05, 2.04)  | 0.04    | -0.02<br>(-0.48, 0.45) | 0.94    | -0.06<br>(-0.15, 0.02)  | 0.16    |
| Q3        | -0.22<br>(-1.2, 0.77) | 0.67    | 0.77<br>(-0.23, 1.76) | 0.13    | 0.15<br>(-0.31, 0.61)  | 0.52    | -0.09<br>(-0.18, -0.01) | 0.03    |
| Q4        | -0.23<br>(-1.2, 0.74) | 0.64    | 1.38<br>(0.38, 2.38)  | 0.01    | -0.02<br>(-0.48, 0.44) | 0.93    | -0.08<br>(-0.17, 0)     | 0.06    |
| p-trend** | -0.86<br>(-2.6, 0.87) | 0.33    | 1.51<br>(-0.29, 3.31) | 0.10    | -0.22<br>(-1.64, 1.18) | 0.75    | -0.16<br>(-0.31, 0)     | 0.05    |

\*All models adjusted for chronological age and outcome measure at baseline, follow up time, smoking, alcohol use, BMI, cell composition, hypertension status, CHD status, and diabetes status. \*\*Using mtDNACn as continuous models.
